# Supplementary material for: Elevated Plasma Soluble PD-L1 Levels in Out-of-Hospital Cardiac Arrest Patients
Source: MDPI journal article supplement (doi:10.3390/jcm10184188), 2021-09-16
Supplement: s1 [file s1]

Table S1. Clinical parameters of study participants

|                                 | Control(healthy<br>volunteers),<br>N=18 | SIRS(without<br>sepsis), N=27 | Sepsis, N=27 | OHCA, N=30  | P value |
|---------------------------------|-----------------------------------------|-------------------------------|--------------|-------------|---------|
| Age, years                      | 49.8±14.5                               | 57.7±20.6                     | 68.4 ±18.2   | 75.4±14.2   | <0.001  |
| Gender Male/Female              | 8/10                                    | 10/17                         | 11/16        | 18/12       | 0.859   |
| sPDL1 (pg/ml)                   | 21.0±4.8                                | 46.9±9.8                      | 157.1±4.2    | 115.3±13.5  | <0.001  |
| TP, g/dL                        |                                         | 6.4±0.2                       | 5.5±0.2      | 6.1±0.2     | 0.012   |
| Alb, g/dL                       |                                         | 3.5±0.1                       | 2.7±0.1      | 3.0±0.1     | <0.001  |
| BUN, mg/dL                      |                                         | 15.4±1.4                      | 27.7±3.2     | 28.6±3.4    | <0.001  |
| Cre, mg/dL                      |                                         | 0.8±0.1                       | 1.1±0.1      | 1.5±0.1     | <0.001  |
| AST, U/L                        |                                         | 50.8±10.4                     | 137.9±47.2   | 716.6±182.2 | <0.001  |
| ALT, U/L                        |                                         | 42.0±9.6                      | 98.1±36.7    | 402.9±90.6  | <0.001  |
| T-bil, mg/dL                    |                                         | 1.0±0.1                       | 1.8±0.8      | 0.82±0.1    | 0.531   |
| CRP, mg/dL                      |                                         | 5.6±1.4                       | 12.4±1.6     | 6.2±1.8     | 0.005   |
| WBC count, ×10 <sup>9</sup> /L  |                                         | 11.4±0.9                      | 14.8±1.2     | 11.1±0.9    | 0.335   |
| Hb, g/dL                        |                                         | 11.8±0.48                     | 10.7±0.3     | 11.3±0.5    | 0.204   |
| Hct, %                          |                                         | 35.3±1.3                      | 32.3±1.0     | 38.9±1.6    | 0.031   |
| Neutrophil, ×10 <sup>9</sup> /L |                                         | 9.0±0.9                       | 12.8±8.1     | 6.3±0.7     | 0.002   |
| Lymphocyte, ×10 <sup>9</sup> /L |                                         | 1.6±0.2                       | 0.5±1.5      | 4.0±0.4     | <0.001  |
| Monocyte, ×10 <sup>9</sup> /L   |                                         | 0.6±0.2                       | 0.5±0.1      | 0.5±0.1     | 0.519   |
| Platelet, ×10 <sup>3</sup> /μL  |                                         | 215.6±19.3                    | 175.4±22.9   | 176.6±16.9  | <0.001  |
| SOFA score                      |                                         | 5.5±0.7                       | 8.4±0.9      | -           | 0.016   |

Results are expressed as mean +/- SEM. The following abbreviations are used. TP: total protein, Alb: albumin, SOFA score: sequential organ failure assessment score.
